# Supplementary material for: Structure and dynamics of the [Zn(NH3)(H2O)5]2+ complex in aqueous solution obtained by an ab initio QM/MM molecular dynamics study
Source: Royal Society of Chemistry journal article supplement (doi:10.1039/b518223a), 2006-01-01
Supplement: b518223a.pdf [file b518223a.pdf]

### Supporting material

Structure and dynamics of the  $[\text{Zn}(\text{NH}_3)(\text{H}_2\text{O})_5]^{2+}$  complex in aqueous solution obtained by an ab initio QM/MM molecular dynamics study

#### Original basis set for Zn

```
$basis
*
zn LANL2DZ ECP
*
  2 s
    0.799700000      -0.648611200
    0.175200000      1.31382910
  1 s
    0.556000000E-01  1.00000000
  1 p
    0.120200000      1.00000000
  1 p
    0.351000000E-01  1.00000000
  4 d
    68.8500000      0.258532000E-01
    18.3200000      0.165119500
    5.92200000      0.446821200
    1.92700000      0.583108000
  1 d
    0.552800000      1.00000000
*
$ecp
*
zn LANL2DZ ECP
*
  ncore = 18   lmax = 3
f
  -18.00000000  1   386.73796600
  -124.35274030 2   72.85873590
  -30.66018220  2   15.90661700
  -10.63589890  2    4.35023400
  -0.76836230  2    1.28421990
s-f
  3.00000000  0   19.08678580
  22.52342250  1    5.02310800
  48.44659420  2    1.27017440
  -44.55601190 2    1.06712870
  12.99839580  2    0.92641900
p-f
  5.00000000  0   43.49277500
  20.74355890  1   20.86926690
  90.30271580  2   21.71183780
  74.66103160  2    6.36169150
  9.88944240  2    1.22911950
d-f
  -4.84903590  2   13.58518000
  3.69133790  2    9.83730500
  -0.50373190  2    0.83731130
*
$end
```

## Basis Sets Modified for Zn(II) ion

\$basis

\*

zn LANL2DZ ECP

\*

|   |   |             |                 |
|---|---|-------------|-----------------|
| 2 | s |             |                 |
|   |   | 0.799700000 | -0.648611200    |
|   |   | 0.175200000 | 1.31382910      |
| 1 | p |             |                 |
|   |   | 0.120200000 | 1.00000000      |
| 4 | d |             |                 |
|   |   | 68.8500000  | 0.258532000E-01 |
|   |   | 18.3200000  | 0.165119500     |
|   |   | 5.92200000  | 0.446821200     |
|   |   | 1.92700000  | 0.583108000     |
| 1 | d |             |                 |
|   |   | 0.552800000 | 1.00000000      |

\*

\$ecp

\*

zn LANL2DZ ECP

\*

ncore = 18 lmax = 3

f

|               |   |              |
|---------------|---|--------------|
| -18.00000000  | 1 | 386.73796600 |
| -124.35274030 | 2 | 72.85873590  |
| -30.66018220  | 2 | 15.90661700  |
| -10.63589890  | 2 | 4.35023400   |
| -0.76836230   | 2 | 1.28421990   |

s-f

|              |   |             |
|--------------|---|-------------|
| 3.00000000   | 0 | 19.08678580 |
| 22.52342250  | 1 | 5.02310800  |
| 48.44659420  | 2 | 1.27017440  |
| -44.55601190 | 2 | 1.06712870  |
| 12.99839580  | 2 | 0.92641900  |

p-f

|             |   |             |
|-------------|---|-------------|
| 5.00000000  | 0 | 43.49277500 |
| 20.74355890 | 1 | 20.86926690 |
| 90.30271580 | 2 | 21.71183780 |
| 74.66103160 | 2 | 6.36169150  |
| 9.88944240  | 2 | 1.22911950  |

d-f

|             |   |             |
|-------------|---|-------------|
| -4.84903590 | 2 | 13.58518000 |
| 3.69133790  | 2 | 9.83730500  |
| -0.50373190 | 2 | 0.83731130  |

\*

Send
